# Supplementary material for: Effectiveness and Safety of Progressive Loading–Motion Style Acupuncture Treatment for Acute Low Back Pain after Traffic Accidents: A Randomized Controlled Trial
Source: MDPI journal article supplement (doi:10.3390/healthcare11222939), 2023-11-10
Supplement: s1 [file s1]

**Supplementary Table S1. Details of motion style acupuncture treatment (MSAT) and traditional acupuncture treatment based on the STRICTA 2010 checklist.**

| Item                                    | Detail                                                                                                                                                                                                                                                                                                                                                                               |
|-----------------------------------------|--------------------------------------------------------------------------------------------------------------------------------------------------------------------------------------------------------------------------------------------------------------------------------------------------------------------------------------------------------------------------------------|
| <b>1. Acupuncture rationale</b>         | <b>1a) Style of acupuncture:</b><br>MSAT: 3 days of motion style acupuncture + traditional Korean acupuncture<br>Control: traditional Korean acupuncture                                                                                                                                                                                                                             |
|                                         | <b>1b) Reasoning for treatment provided, based on historical context, sources in the literature, and/or consensus methods, with references where appropriate:</b><br>MSAT: used by Korean medicine doctors (1, 2) and based on the consensus of a group of clinical experts<br>Traditional Korean: based on the textbook of acupuncture and commonly used by Korean medicine doctors |
|                                         | <b>1c) Extent to which treatment was varied:</b><br>MSAT: each treatment is performed for about 10 minutes, but the degree and frequency of movement can be adjusted at the discretion of the doctor<br>Traditional Korean: 6-12 needles among essential and optional acupoints                                                                                                      |
|                                         | <b>2a) Number of needle insertions per subject per session:</b><br>MSAT: 6 acupoints/traditional Korean: 6-12 acupoints                                                                                                                                                                                                                                                              |
| <b>2. Details of needling</b>           | <b>2b) Names (or location if no standard name) of points used (uni/bilateral):</b><br>MSAT: GV4 or GV3, LR2 bilateral<br>Traditional Korean: essential—BL24, BL25, BL26; bilateral/optional—BL40, SP6, BL23 bilateral                                                                                                                                                                |
|                                         | <b>2c) Depth of insertion, based on a specified unit of measurement, or on a particular tissue level:</b><br>MSAT: 15-20 mm at GV4 or GV3, 10-15 mm at LR2<br>Traditional Korean: based on the physician's judgment                                                                                                                                                                  |
|                                         | <b>2d) Response sought (e.g., de qi or muscle twitch response):</b><br>MSAT: none; traditional Korean: de qi                                                                                                                                                                                                                                                                         |
|                                         | <b>2e) Needle stimulation (e.g., manual, electrical):</b><br>MSAT: manual stimulation during movement<br>Traditional Korean: electrical stimulation                                                                                                                                                                                                                                  |
|                                         | <b>2f) Needle retention time:</b><br>MSAT: about 10 minutes; traditional Korean: 15 minutes                                                                                                                                                                                                                                                                                          |
|                                         | <b>2g) Needle type (diameter, length, and manufacturer or material):</b><br>0.30 * 40 mm, stainless steel, Dongbang medical, Korea                                                                                                                                                                                                                                                   |
|                                         |                                                                                                                                                                                                                                                                                                                                                                                      |
| <b>3. Treatment regimen</b>             | <b>3a) Number of treatment sessions</b><br>MSAT: 3 sessions; traditional Korean: 8-26 sessions                                                                                                                                                                                                                                                                                       |
|                                         | <b>3b) Frequency and duration of treatment sessions:</b><br>MSAT: once a day for 3 days; traditional Korean: twice a day for 5–13 days                                                                                                                                                                                                                                               |
| <b>4. Other components of treatment</b> | <b>4a) Details of other interventions administered to the acupuncture group (e.g., moxibustion, cupping, herbs, exercises, lifestyle advice):</b><br>Integrative Korean medicine treatment, such as acupuncture, pharmacopuncture, chuna manual therapy, and herbal medicine                                                                                                         |
|                                         | <b>4b) Setting and context of treatment, including instructions to practitioners, and information and explanations to patients:</b><br>None in particular                                                                                                                                                                                                                            |

|                                               |                                                                                                                                                                                                                                   |
|-----------------------------------------------|-----------------------------------------------------------------------------------------------------------------------------------------------------------------------------------------------------------------------------------|
| <b>5. Practitioner background</b>             | <b>5) Description of participating acupuncturists (qualification or professional affiliation, years in acupuncture practice, other relevant experience):</b>                                                                      |
|                                               | Korean medicine doctor with at least 3 years of clinical experience and affiliated with Bucheon Jaseng hospital.                                                                                                                  |
| <b>6. Control or comparator interventions</b> | <b>6a) Rationale for the control or comparator in the context of the research question, with sources that justify this choice:</b>                                                                                                |
|                                               | For the purpose of the study evaluating the effectiveness of additional treatment with MSAT in traditional Korean medicine treatment, the control was defined as a group that received integrative Korean medicine treatment only |
|                                               | <b>6b) Precise description of the control or comparator. If sham acupuncture or any other type of acupuncture-like control is used, provide details as for Items 1 to 3 above:</b>                                                |
|                                               | Integrative Korean medicine treatment such as acupuncture, pharmacopuncture, chuna manual therapy, herbal medicine, etc. Details related to acupuncture are mentioned for items 1–3                                               |

**Abbreviations:** MSAT, motion style acupuncture treatment.

**Supplementary Table S2. Study schedule and measurements at each visit.**

| Visit                                    | Study period               |                  |               |                |                   |                              |                 |
|------------------------------------------|----------------------------|------------------|---------------|----------------|-------------------|------------------------------|-----------------|
|                                          | Screening                  | Active treatment |               |                |                   | Follow up                    |                 |
|                                          | Day <sup>1</sup> 1<br>(V1) | Day 2<br>(V2)    | Day 3<br>(V3) | Day 4<br>(V4)  | D/C<br>(V5)       | 1 month <sup>2</sup><br>(V6) | 3 month<br>(V7) |
| Enrollment                               |                            |                  |               |                |                   |                              |                 |
| Informed consent form                    | ○                          |                  |               |                |                   |                              |                 |
| Confirm suitability for study            | ○                          |                  |               |                |                   |                              |                 |
| Block randomization                      | ○                          |                  |               |                |                   |                              |                 |
| Credibility and Expectancy Questionnaire | ○                          |                  |               |                |                   |                              |                 |
| History (post-TA neck pain and other)    | ○                          |                  |               |                |                   |                              |                 |
| Intervention                             |                            |                  |               |                |                   |                              |                 |
| MSAT+IKMT                                | △<br>(only IK MT)          | ○                | ○             | ○              | △<br>(only IK MT) |                              |                 |
| IKMT                                     | ○                          | ○                | ○             | ○              | ○                 |                              |                 |
| Assessment                               |                            |                  |               |                |                   |                              |                 |
| Check symptoms and Med change            |                            | ○                | ○             | ○              | ○                 | ○                            | ○               |
| NRS of low back pain                     | ○                          | ○*               | ○*            | ○*             | ○                 | ○                            | ○               |
| NRS of leg pain                          | ○                          | ○♀               | ○♀            | ○♀             | ○                 | ○                            | ○               |
| VAS of low back pain                     |                            | ○†               | ○†            | ○†             | ○                 |                              |                 |
| VAS of leg pain                          |                            | ○¥               | ○¥            | ○¥             | ○                 |                              |                 |
| ODI                                      |                            | ○                |               | ○ <sub>b</sub> | ○                 | ○                            | ○               |
| ROM of lumbar                            |                            | ○¶               | ○¶            | ○¶             | ○                 |                              |                 |
| EQ-5D                                    |                            | ○                |               | ○ <sub>b</sub> | ○                 | ○                            | ○               |
| EQ-VAS                                   |                            | ○                |               | ○ <sub>b</sub> | ○                 |                              |                 |
| SF-12                                    |                            | ○                |               | ○ <sub>b</sub> | ○                 | ○                            | ○               |
| PGIC                                     |                            | ○                |               | ○ <sub>b</sub> | ○                 | ○                            | ○               |
| CL-5-K                                   |                            | ○                |               | ○ <sub>b</sub> | ○                 | ○                            | ○               |
| Adverse events                           |                            | ○                | ○             | ○              | ○                 | ○                            | ○               |
| Drug consumption                         | ○                          | ○                | ○             | ○              | ○                 | ○                            | ○               |

Notes: <sup>1</sup> Days from admission, <sup>2</sup> months from discharge, \* additional NRS of low back pain after treatment, ♀ additional NRS of leg pain after treatment, † additional VAS of low back pain after treatment, ¥ additional VAS of leg pain after treatment, ¶ additional ROM of lumbar after treatment, <sub>b</sub> investigation was performed only when the 4th day of hospitalization (V4) and discharge date were the same. Abbreviations: V, visit; MSAT, motion style acupuncture treatment; IKMT, integrative Korean medicine treatment; NRS, numeric rating scale; VAS, visual analogue scale; ODI, Oswestry disability index; ROM, range of motion; EQ-5D, Quality of Life EuroQol 5-Dimension; EQ-VAS, EuroQol visual analogue scale; SF-12, Short Form-12 health survey version 2; PGIC, patient global impression of change; PCL-5-K, Post-Traumatic Stress Disorder Checklist for DSM-5.

**Supplementary Table S3. Comparison of disability outcomes at each measuring point between the PL-MSAT and control groups.**

|                           |               | V2-2                   | V3-1                   | V3-2                   | V4-1                   | V4-2                   | D/C                    | 1M                    | 3M                    |
|---------------------------|---------------|------------------------|------------------------|------------------------|------------------------|------------------------|------------------------|-----------------------|-----------------------|
| ODI score                 | PL-MSAT group |                        |                        |                        |                        |                        | 27.02 (24.83–29.22)    | 21.33 (17.92–24.74)   | 16.17 (13.51–18.83)   |
|                           | Control group |                        |                        |                        |                        |                        | 27.84 (25.72–29.96)    | 20.68 (17.28–24.09)   | 14.29 (11.64–16.93)   |
|                           | Difference    |                        |                        |                        |                        |                        | 0.81 (–2.32 to 3.95)   | –0.65 (–5.53 to 4.23) | –1.88 (–5.67 to 1.91) |
|                           | P value       |                        |                        |                        |                        |                        | 0.608                  | 0.792                 | 0.327                 |
| ROM flexion               | PL-MSAT group | 73.04 (71.30–74.79)    | 74.69 (72.69–76.68)    | 77.41 (75.35–79.47)    | 78.26 (75.99–80.53)    | 81.83 (79.87–83.80)    | 86.33 (84.54–88.12)    |                       |                       |
|                           | Control group | 69.47 (67.74–71.20)    | 71.77 (69.79–73.76)    | 71.95 (69.91–73.98)    | 76.10 (73.80–78.41)    | 76.52 (74.53–78.51)    | 81.60 (79.84–83.35)    |                       |                       |
|                           | Difference    | –3.58 (–6.06 to –1.09) | –2.91 (–5.75 to –0.08) | –5.46 (–8.40 to –2.53) | –2.16 (–5.38 to 1.07)  | –5.31 (–8.15 to –2.48) | –4.73 (–7.27 to –2.19) |                       |                       |
|                           | P value       | 0.005**                | 0.044*                 | <0.001***              | 0.187                  | <0.001***              | <0.001***              |                       |                       |
| ROM extension             | PL-MSAT group | 12.73 (12.01–13.46)    | 13.41 (12.60–14.22)    | 14.39 (13.48–15.30)    | 14.84 (13.92–15.76)    | 15.34 (14.43–16.25)    | 17.54 (16.70–18.37)    |                       |                       |
|                           | Control group | 10.75 (10.03–11.47)    | 11.07 (10.28–11.87)    | 11.45 (10.55–12.34)    | 12.78 (11.88–13.68)    | 13.25 (12.36–14.14)    | 14.95 (14.13–15.78)    |                       |                       |
|                           | Difference    | –1.98 (–3.02 to –0.95) | –2.33 (–3.48 to –1.19) | –2.94 (–4.24 to –1.65) | –2.06 (–3.36 to –0.76) | –2.09 (–3.39 to –0.80) | –2.58 (–3.77 to –1.39) |                       |                       |
|                           | P value       | <0.001***              | <0.001***              | <0.001***              | 0.002**                | 0.002**                | <0.001***              |                       |                       |
| ROM lateral flexion (Rt.) | PL-MSAT group | 19.17 (18.64–19.70)    | 20.40 (19.37–21.43)    | 21.71 (20.56–22.86)    | 23.14 (21.98–24.30)    | 24.22 (22.97–25.47)    | 27.51 (26.55–28.46)    |                       |                       |
|                           | Control group | 18.46 (17.93–18.99)    | 20.41 (19.36–21.45)    | 20.72 (19.59–21.86)    | 21.94 (20.73–23.16)    | 22.26 (20.90–23.61)    | 24.29 (23.35–25.22)    |                       |                       |
|                           | Difference    | –0.71 (–1.46 to 0.05)  | 0.00 (–1.48 to 1.49)   | –0.99 (–2.64 to 0.67)  | –1.20 (–2.92 to 0.52)  | –1.96 (–3.85 to –0.08) | –3.22 (–4.58 to –1.86) |                       |                       |
|                           | P value       | 0.066                  | 0.995                  | 0.238                  | 0.169                  | 0.042*                 | <0.001***              |                       |                       |
| ROM lateral flexion (Lt.) | PL-MSAT group | 18.98 (18.35–19.61)    | 20.19 (19.03–21.36)    | 21.68 (20.42–22.94)    | 23.02 (21.83–24.22)    | 24.38 (23.11–25.65)    | 27.63 (26.64–28.62)    |                       |                       |
|                           | Control group | 17.57 (16.95–18.20)    | 19.94 (18.78–21.10)    | 20.30 (19.04–21.55)    | 22.07 (20.84–23.31)    | 22.07 (20.74–23.40)    | 24.16 (23.19–25.13)    |                       |                       |
|                           | Difference    | –1.40 (–2.30 to –0.51) | –0.25 (–1.92 to 1.42)  | –1.38 (–3.19 to 0.43)  | –0.95 (–2.71 to 0.81)  | –2.31 (–4.21 to –0.41) | –3.47 (–4.88 to –2.06) |                       |                       |
|                           | P value       | 0.003**                | 0.767                  | 0.133                  | 0.287                  | 0.017*                 | <0.001***              |                       |                       |
| ROM rotation (Rt.)        | PL-MSAT group | 31.57 (30.78–32.36)    | 33.42 (32.16–34.68)    | 34.69 (33.39–36.00)    | 36.20 (34.90–37.51)    | 37.41 (36.00–38.82)    | 41.07 (39.79–42.35)    |                       |                       |
|                           | Control group | 29.93 (29.15–30.71)    | 32.56 (31.28–33.84)    | 33.03 (31.74–34.32)    | 35.31 (33.97–36.66)    | 36.57 (35.09–38.06)    | 38.57 (37.30–39.83)    |                       |                       |
|                           | Difference    | –1.64 (–2.77 to –0.52) | –0.86 (–2.68 to 0.96)  | –1.66 (–3.55 to 0.22)  | –0.89 (–2.82 to 1.04)  | –0.84 (–2.92 to 1.25)  | –2.51 (–4.34 to –0.67) |                       |                       |
|                           | P value       | 0.005**                | 0.35                   | 0.083                  | 0.363                  | 0.427                  | 0.008**                |                       |                       |
| ROM rotation (Lt.)        | PL-MSAT group | 32.22 (31.48–32.95)    | 33.68 (32.38–34.97)    | 35.04 (33.73–36.34)    | 36.69 (35.42–37.95)    | 37.59 (36.17–39.01)    | 41.38 (40.18–42.59)    |                       |                       |
|                           | Control group | 30.77 (30.04–31.49)    | 33.05 (31.75–34.35)    | 33.54 (32.22–34.85)    | 35.36 (34.06–36.65)    | 36.46 (34.95–37.97)    | 38.56 (37.37–39.74)    |                       |                       |
|                           | Difference    | –1.45 (–2.49 to –0.41) | –0.63 (–2.48 to 1.23)  | –1.50 (–3.41 to 0.41)  | –1.33 (–3.18 to 0.52)  | –1.13 (–3.20 to 0.94)  | –2.83 (–4.55 to –1.11) |                       |                       |
|                           | P value       | 0.007**                | 0.506                  | 0.122                  | 0.156                  | 0.282                  | 0.001**                |                       |                       |

**Notes:** Outcomes were analyzed according to the intention-to-treat principle, and missing data were imputed with multiple imputations. The dashes indicate that outcome measurements were not administered. The outcome measurements at the 14-day follow-up were excluded because they were similar to the discharge outcomes. The mean lengths of stay in the PL-MSAT and control groups were  $8.73 \pm 3.84$  and  $8.41 \pm 3.91$

days, respectively. Five and six participants in the PL-MSAT and control groups, respectively, were discharged before treatment completion. The differences between the PL-MSAT and control groups are shown as the mean and 95% confidential interval. Analysis of covariance was performed to calculate the differences and p-values. The covariates included each baseline of each outcome and PCL-5-K. The values are presented with 95% confidence interval. \* P < 0.05; \*\* P < 0.01; \*\*\* P < 0.001. **Abbreviations:** V, visit; D/C, discharge; M, month; PL-MSAT, progressive loading–motion style acupuncture treatment; ODI, Oswestry disability index; ROM, range of motion; Rt., right; Lt., left.

**Supplementary Table S4. Comparison of quality-of-life outcomes at each measuring point between the PL-MSAT and control groups.**

|          |               | V2-2 | V3-1 | V3-2 | V4-1 | V4-2 | D/C                   | 1M                   | 3M                    |
|----------|---------------|------|------|------|------|------|-----------------------|----------------------|-----------------------|
| EQ-5D-5L | PL-MSAT group |      |      |      |      |      | 0.77 (0.74–0.80)      | 0.80 (0.78–0.83)     | 0.84 (0.82–0.87)      |
|          | Control group |      |      |      |      |      | 0.79 (0.76–0.81)      | 0.84 (0.81–0.86)     | 0.86 (0.84–0.89)      |
|          | Difference    |      |      |      |      |      | 0.02 (–0.02 to 0.06)  | 0.03 (0.00–0.07)     | 0.02 (–0.02 to 0.06)  |
|          | P value       |      |      |      |      |      | 0.344                 | 0.08                 | 0.273                 |
|          |               |      |      |      |      |      |                       |                      |                       |
| PCS      | PL-MSAT group |      |      |      |      |      | 39.50 (37.74–41.26)   | 43.74 (41.88–45.59)  | 47.38 (45.45–49.31)   |
|          | Control group |      |      |      |      |      | 41.91 (40.19–43.62)   | 45.23 (43.37–47.09)  | 47.97 (46.03–49.91)   |
|          | Difference    |      |      |      |      |      | 2.41 (–0.10 to 4.92)  | 1.50 (–1.17 to 4.17) | 0.60 (–2.18 to 3.37)  |
|          | P value       |      |      |      |      |      | 0.06                  | 0.269                | 0.671                 |
|          |               |      |      |      |      |      |                       |                      |                       |
| MCS      | PL-MSAT group |      |      |      |      |      | 46.99 (44.61–49.37)   | 51.06 (48.55–53.56)  | 52.84 (50.70–54.99)   |
|          | Control group |      |      |      |      |      | 45.29 (42.97–47.62)   | 51.44 (48.95–53.92)  | 52.36 (50.23–54.48)   |
|          | Difference    |      |      |      |      |      | –1.70 (–5.09 to 1.70) | 0.38 (–3.21 to 3.97) | –0.49 (–3.55 to 2.57) |
|          | P value       |      |      |      |      |      | 0.324                 | 0.833                | 0.753                 |
|          |               |      |      |      |      |      |                       |                      |                       |

**Notes:** Outcomes were analyzed according to the intention-to-treat principle, and missing data were imputed with multiple imputations. The dashes indicate that outcome measurements were not administered. The outcome measurements at the 14-day follow-up were excluded because they were similar to the discharge outcomes. The mean lengths of stay in the PL-MSAT and control groups were 8.73 ± 3.84 and 8.41 ± 3.91 days, respectively. Five and six participants in the PL-MSAT and control groups, respectively, were discharged before treatment completion. The differences between the PL-MSAT and control groups are shown as the mean and 95% confidential interval. Analysis of covariance was performed to calculate the differences and p-values. The covariates included each baseline of each outcome and PCL-5-K. The values are presented with 95% confidence interval. \* P < 0.05; \*\* P < 0.01; \*\*\* P < 0.001. **Abbreviations:** V, visit; D/C, discharge; M, month; PL-MSAT, progressive loading–motion style acupuncture treatment; EQ-5D, Quality of Life EuroQol 5-Dimension; PCS, physical component summary; MCS, mental component summary.

**Supplementary Table S5. Comparison of PGIC at each measuring point between the PL-MSAT and control groups.**

|      |               | V2-2                   | V3-1 | V3-2 | V4-1 | V4-2 | D/C                  | 1M                   | 3M               |
|------|---------------|------------------------|------|------|------|------|----------------------|----------------------|------------------|
| PGIC | PL-MSAT group | 3.36 (3.19–3.53)       |      |      |      |      | 2.45 (2.26–2.65)     | 2.38 (2.15–2.61)     | 2.38 (2.14–2.62) |
|      | Control group | 3.75 (3.58–3.92)       |      |      |      |      | 2.40 (2.20–2.59)     | 2.19 (1.95–2.43)     | 1.98 (1.74–2.22) |
|      | Difference    | –0.39 (–0.63 to –0.15) |      |      |      |      | 0.06 (–0.22 to 0.34) | 0.19 (–0.14 to 0.52) | 0.40 (0.06–0.75) |
|      | P value       | 0.002**                |      |      |      |      | 0.686                | 0.261                | 0.023*           |
|      |               |                        |      |      |      |      |                      |                      |                  |

**Notes:** Outcomes were analyzed according to the intention-to-treat principle, and missing data were imputed with multiple imputations. The dashes indicate that outcome measurements were not administered. The outcome measurements at the 14-day follow-up were excluded because they were similar to the discharge outcomes. The mean lengths of stay in the PL-MSAT and control groups were 8.73 ± 3.84 and 8.41 ± 3.91 days, respectively. Five and six participants in the PL-MSAT and control groups, respectively, were discharged before treatment completion. The differences between PL-MSAT and control groups are shown as the mean and 95% confidential interval. Analysis of covariance was performed to calculate the differences and p-values. The covariates included each baseline of each outcome and PCL-5-K. The values are presented with 95% confidence interval. \* P < 0.05; \*\* P < 0.01; \*\*\* P < 0.001. **Abbreviations:** V, visit; D/C, discharge; M, month; PL-MSAT, progressive loading–motion style acupuncture treatment; PGIC, patient global impression of change.

**Supplementary Table S6. Comparison of PCL-5-K at each measuring point between the PL-MSAT and control groups.**

|               | V2-2 | V3-1 | V3-2 | V4-1 | V4-2 | D/C                   | 1M                    | 3M                    |
|---------------|------|------|------|------|------|-----------------------|-----------------------|-----------------------|
| PCL-5-K       |      |      |      |      |      |                       |                       |                       |
| PL-MSAT group |      |      |      |      |      | 16.46 (13.87–19.06)   | 11.57 (9.06–14.09)    | 9.20 (6.81–11.59)     |
| Control group |      |      |      |      |      | 16.23 (13.74–18.72)   | 10.85 (8.39–13.32)    | 8.61 (6.27–10.94)     |
| Difference    |      |      |      |      |      | –0.23 (–3.89 to 3.42) | –0.72 (–4.29 to 2.85) | –0.59 (–3.98 to 2.79) |
| P value       |      |      |      |      |      | 0.9                   | 0.69                  | 0.728                 |

**Notes:** Outcomes were analyzed according to the intention-to-treat principle, and missing data were imputed with multiple imputations. The dashes indicate that outcome measurements were not administered. The outcome measurements at the 14-day follow-up were excluded because they were similar to the discharge outcomes. The mean lengths of stay in the PL-MSAT and control groups were  $8.73 \pm 3.84$  and  $8.41 \pm 3.91$  days, respectively. Five and six participants in the PL-MSAT and control groups, respectively, were discharged before treatment completion. The differences between the PL-MSAT and control groups are shown as the mean and 95% confidential interval. Analysis of covariance was performed to calculate the differences and p-values. The covariates included each baseline of each outcome and PCL-5-K. The values are presented with 95% confidence interval. \*  $P < 0.05$ ; \*\*  $P < 0.01$ ; \*\*\*  $P < 0.001$ . **Abbreviations:** V, visit; D/C, discharge; M, month; PL-MSAT, progressive loading–motion style acupuncture treatment; PCL-5-K, Post-Traumatic Stress Disorder Checklist for DSM-5.
